# Supplementary material for: Assembling silver(i) coordination polymers of an NS4-macrocycle via an endo/exocyclic coordination mode
Source: Royal Society of Chemistry journal article supplement (doi:10.1039/d3ce00886j), 2023-01-01
Supplement: d3ce00886j1.pdf [file d3ce00886j1.pdf]

**Electronic supplementary information**  
**for**  
**Assembling silver(I) coordination polymers of an NS<sub>4</sub>-  
macrocycle via an endo/exocyclic coordination mode**

Seulgi Kim,<sup>\*a</sup> Shim Sung Lee,<sup>a</sup> Joon Rae Kim<sup>b</sup> and Eunji Lee<sup>\*b</sup>

<sup>a</sup>*Department of Chemistry and Research Institute of Natural Science, Gyeongsang National University,  
Jinju 52828, South Korea*

<sup>b</sup>*Department of Chemistry, Gangneung-Wonju National University, Gangneung 25457, South Korea*

## Experimental

### General procedures

All chemicals and solvents used in the syntheses were of reagent grade and were used without further purification. The FT-IR spectra were measured using a Thermo Fisher Scientific Nicolet iS 10 FT-IR spectrometer. Each product obtained in this work was dried in a vacuum before elemental analysis, which was carried out on a Thermo Scientific Flash 2000 Series elemental analyser. The powder X-ray diffraction (PXRD) experiments were performed in transmission mode with a Bruker D8 Advance A25 diffractometer equipped with graphite monochromated Cu K $\alpha$  radiation ( $\lambda = 1.54073 \text{ \AA}$ ).

### Preparations of {[Ag<sub>3</sub>L<sub>2</sub>](PF<sub>6</sub>)<sub>3</sub>·2CH<sub>2</sub>Cl<sub>2</sub>}<sub>n</sub> (1)

AgPF<sub>6</sub> (19.27 mg, 0.076 mmol) in methanol (1.0 mL) was added to a solution of **L** (10.0 mg, 0.025 mmol) in dichloromethane (1.0 mL). Slow evaporation of the solution afforded a colourless crystalline product **1** suitable for X-ray analysis. Yield: 37%; Mp: 168-169 °C. IR: 3005, 2922, 1593, 1573, 1455, 1421, 1269, 1223, 1162, 1087, 1007, 840 (PF<sub>6</sub><sup>-</sup>), 714 cm<sup>-1</sup>. Anal. calc. for C<sub>38</sub>H<sub>46</sub>Ag<sub>3</sub>P<sub>3</sub>F<sub>18</sub>N<sub>2</sub>S<sub>8</sub>: C, 29.53; H, 3.00; N, 1.81. Found: C, 29.65; H, 3.01; N, 1.89%.

### Preparation of {[Ag<sub>4</sub>L<sub>2</sub>(CF<sub>3</sub>SO<sub>3</sub>)<sub>2</sub>](CF<sub>3</sub>SO<sub>3</sub>)<sub>2</sub>·CH<sub>2</sub>Cl<sub>2</sub>}<sub>n</sub> (2)

AgCF<sub>3</sub>SO<sub>3</sub> (19.58 mg, 0.076 mmol) in methanol (1.0 mL) was added to a solution of **L** (10.1 mg, 0.025 mmol) in dichloromethane (1.0 mL). Slow evaporation of the solution afforded a colourless crystalline product **2** suitable for X-ray analysis. Yield: 48%; Mp: 199-200 °C (decomp.) IR: 2992, 2952, 2925, 1629, 1592, 1572, 1455, 1272 (CF<sub>3</sub>SO<sub>3</sub><sup>-</sup>), 1240, 1168, 1093, 1027 (CF<sub>3</sub>SO<sub>3</sub><sup>-</sup>), 897, 808 cm<sup>-1</sup>. Anal. calc. for C<sub>21</sub>H<sub>23</sub>Ag<sub>2</sub>F<sub>6</sub>NO<sub>6</sub>S<sub>6</sub>: C, 27.79; H, 2.55; N, 1.54. Found: C, 27.84; H, 2.60; N, 1.58%.

### Preparations of {[Ag<sub>4</sub>L<sub>2</sub>(CF<sub>3</sub>CO<sub>2</sub>)<sub>2</sub>](CF<sub>3</sub>CO<sub>2</sub>)<sub>2</sub>·4CH<sub>3</sub>OH}<sub>n</sub> (3)

AgCF<sub>3</sub>CO<sub>2</sub> (16.83 mg, 0.076 mmol) in methanol (1.0 mL) was added to a solution of **L** (10.0 mg, 0.025 mmol) in dichloromethane (1.0 mL). Slow evaporation of the solution afforded a colourless crystalline product **3** suitable for X-ray analysis. Yield: 43%; Mp: 178-179 °C (decomp.). IR: 3097, 2913, 1663 (CF<sub>3</sub>CO<sub>2</sub><sup>-</sup>), 1590, 1451, 1435, 1211 (CF<sub>3</sub>CO<sub>2</sub><sup>-</sup>), 1133, 839, 807, 724 cm<sup>-1</sup>. Anal. calc. for C<sub>23</sub>H<sub>23</sub>Ag<sub>2</sub>F<sub>6</sub>NO<sub>4</sub>S<sub>4</sub>: C, 33.07; H, 2.78; N, 1.68. Found: C, 33.19; H, 2.80; N, 1.81%.

### Anion exchange

The anion exchange experiments were performed with products **1-3** (5 mg) by immersing in 3 M aqueous solution (2.0 mL) of each sodium salt and leaving undisturbed at room temperature. Each solid sample was periodically collected by filtration, washed several times with distilled water, and then dried in air.

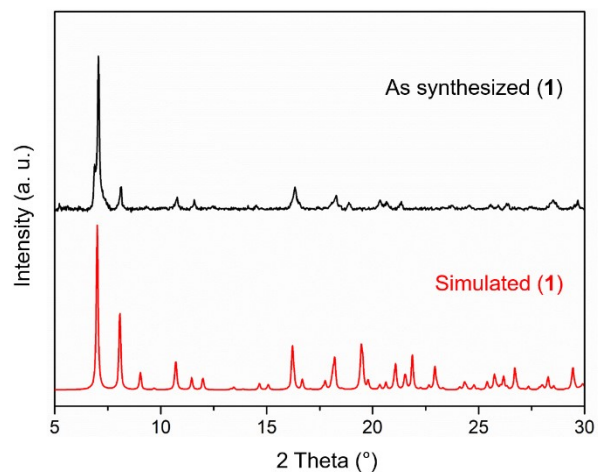

(a)

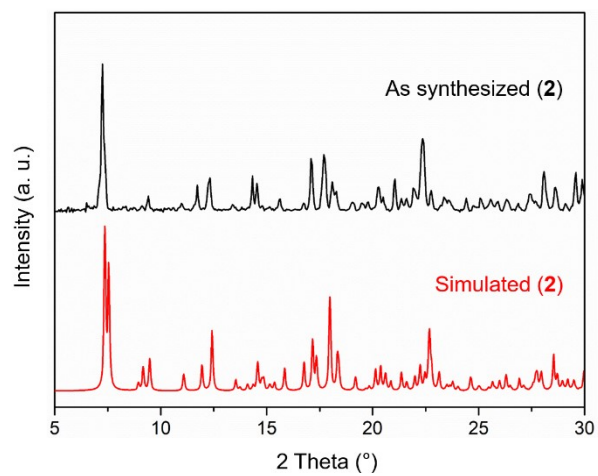

(b)

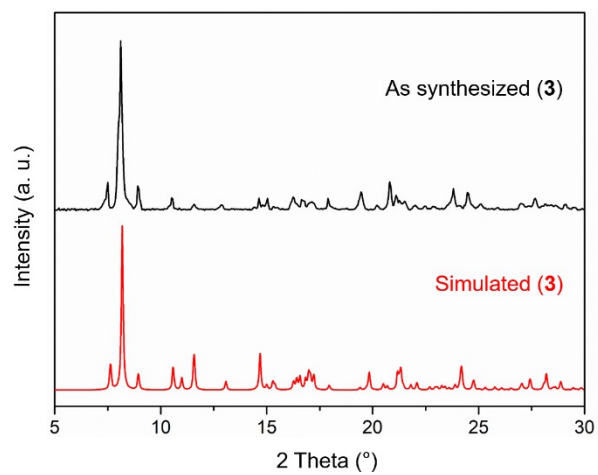

(c)

**Fig. S1** PXRD patterns for (a) **1**, (b) **2** and (c) **3**: (top) as synthesised and (bottom) simulated from the single crystal X-ray data.

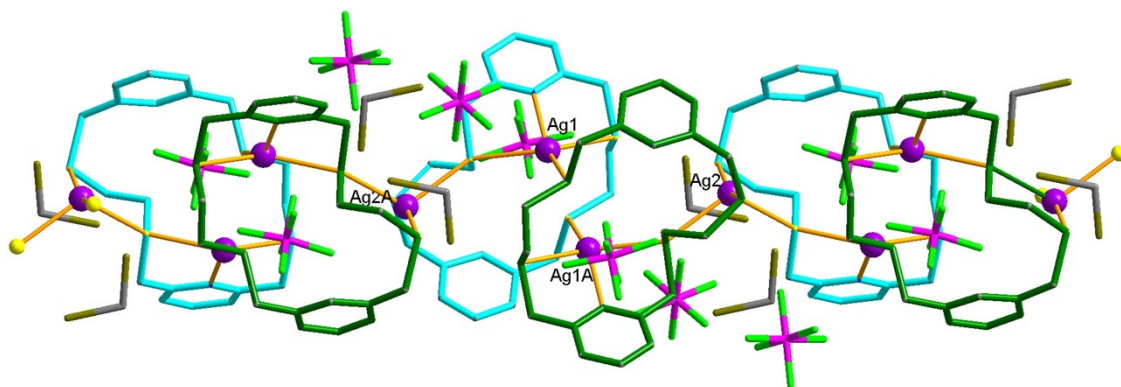

(a)

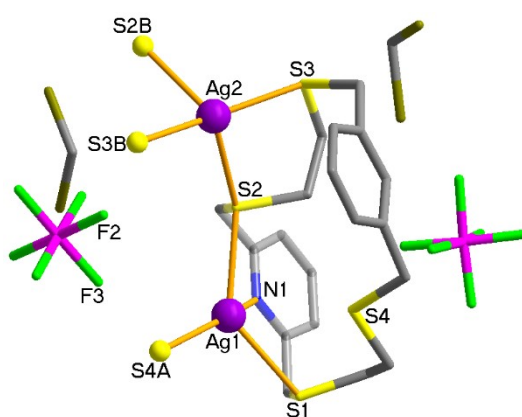

(b)

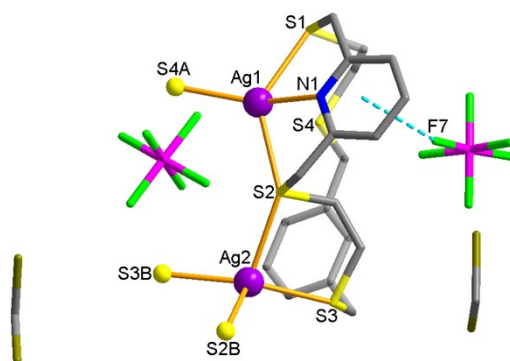

(c)

**Fig. S2** Crystal structure of **1** ( $\text{PF}_6^-$  form) showing non-coordinated anions and solvent molecules: (a) 1D polymeric array, (b) asymmetric unit and (c) anion- $\pi$  interaction between one  $\text{PF}_6^-$  and the pyridyl moiety (green dashed line;  $\text{F7} \cdots \text{centroid}$  3.316 Å). The shortest distance between Ag(I) and anion;  $\text{Ag1} \cdots \text{F3}$  3.767 Å.

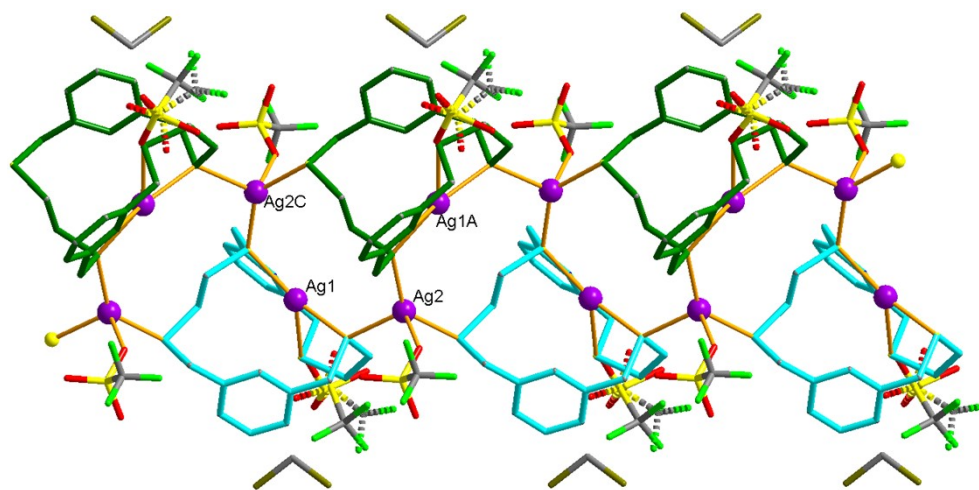

(a)

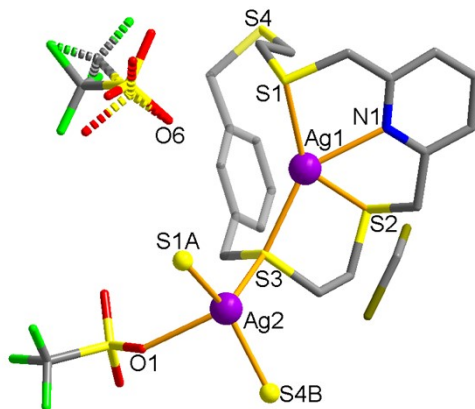

(b)

**Fig. S3** Crystal structure of **2** ( $\text{CF}_3\text{SO}_3^-$  form) showing non-coordinated anions and solvent molecules: (a) 1D polymeric array and (b) asymmetric unit. The non-coordinated trifluoromethanesulfonate ion is disordered (60:40). The shortest distance between Ag(I) and the non-coordinated anion;  $\text{Ag1} \cdots \text{O6}$  3.896 Å.

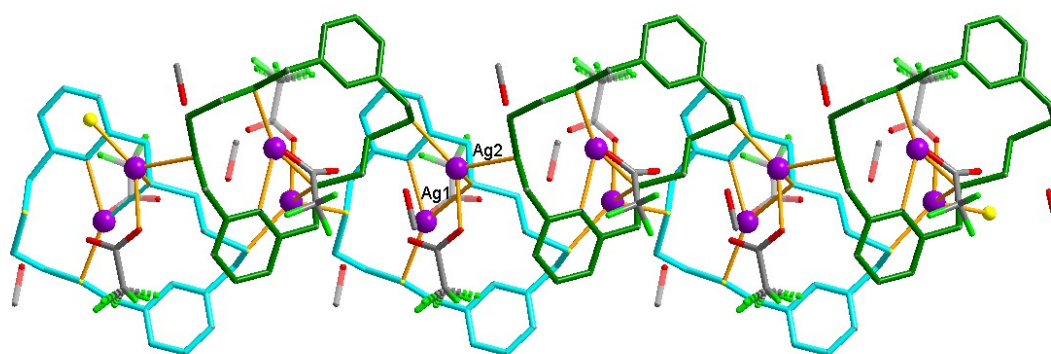

(a)

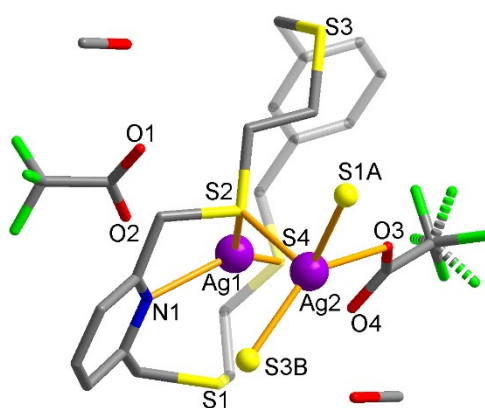

(b)

**Fig. S4** Crystal structure of **3** (CF<sub>3</sub>CO<sub>2</sub><sup>-</sup> form) showing anions and solvent molecules. (a) 1D polymeric array and (b) asymmetric unit. The coordinated trifluoroacetate ion is disordered (86:14). The Ag1 atom weakly interacts with the other anion (Ag1⋯O1 3.117, Ag1⋯O2 3.033 Å).

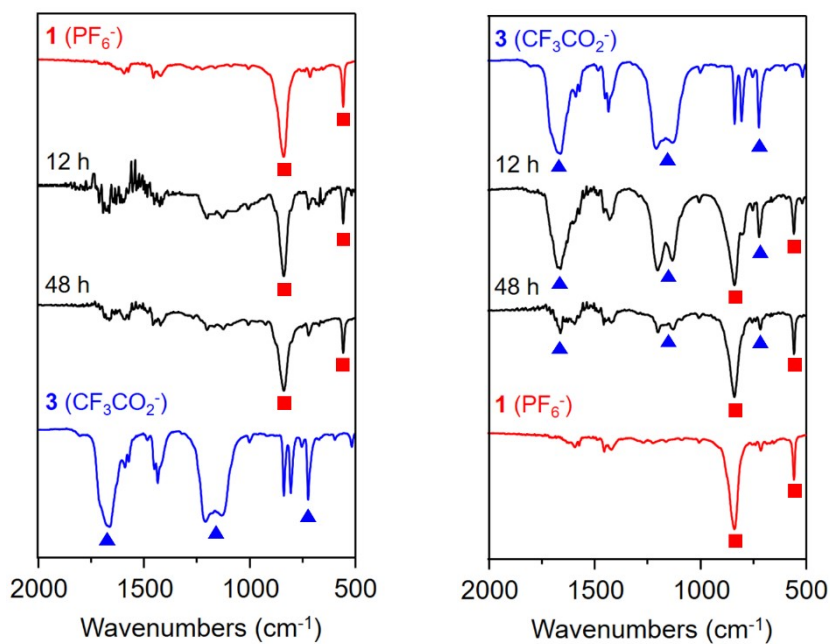

(a)

(b)

**Fig. S5** IR spectra for (a) **1** ( $\text{PF}_6^-$  form) and (b) **3** ( $\text{CF}_3\text{CO}_2^-$  form) after anion exchanges (for 12 h and 48 h) with 3 M  $\text{NaCF}_3\text{CO}_2$  and 3 M  $\text{NaPF}_6$  aqueous solution, respectively.

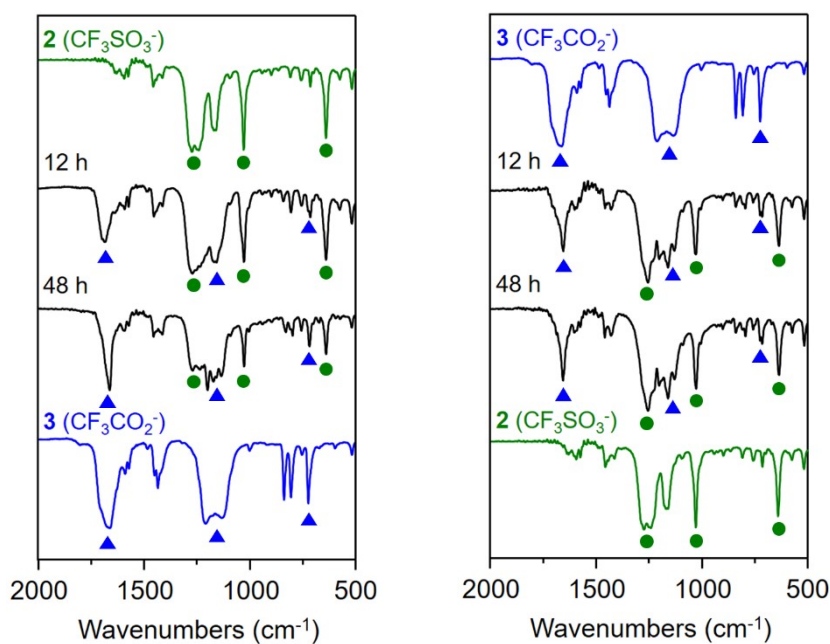

(a)

(b)

**Fig. S6** IR spectra for (a) **2** ( $\text{CF}_3\text{SO}_3^-$  form) and (b) **3** ( $\text{CF}_3\text{CO}_2^-$  form) after anion exchanges (for 12 h and 48 h) with 3 M  $\text{NaCF}_3\text{CO}_2$  and 3 M  $\text{NaCF}_3\text{SO}_3$  aqueous solution, respectively.

## X-ray crystallographic analysis

All data were collected on a Bruker SMART APEX2 ULTRA diffractometer equipped with graphite monochromated Mo K $\alpha$  radiation ( $\lambda = 0.71073 \text{ \AA}$ ) generated by a rotating anode. Data collection, data reduction, and semiempirical absorption correction were carried out using the software package APEX2.<sup>S1</sup> All of the calculations for the structure determination were carried out using the SHELXTL package.<sup>S2</sup> In all cases, all nonhydrogen atoms were refined anisotropically and all hydrogen atoms were placed in idealized positions and refined isotropically in a riding manner along with their respective parent atoms. Relevant crystal data collection and refinement data for the crystal structures of **1-3** are summarised in Table S1.

## References

S1. Bruker, *APEX2 Version 2009.1-0 Data collection and Processing Software*, Bruker AXS Inc., Madison, Wisconsin, U.S.A., 2008.

S2. Bruker, *SHELXTL-PC Version 6.22 Program for Solution and Refinement of Crystal Structures*, Bruker AXS Inc., Madison, Wisconsin, U.S.A., 2008.

CCDC 2290290 (**1**), 2290291 (**2**) and 2290292 (**3**) contain supplementary crystallographic data for this paper. These data can be obtained free of charge from The Cambridge Crystallographic Data Centre via [www.ccdc.cam.ac.uk/data\\_request/cif](http://www.ccdc.cam.ac.uk/data_request/cif).

**Table S1** Crystallographic data and refinement parameters of **1**, **2** and **3**

|                                                                                      | <b>1</b>                                                                                                                     | <b>2</b>                                                                                                                       | <b>3</b>                                                                                      |
|--------------------------------------------------------------------------------------|------------------------------------------------------------------------------------------------------------------------------|--------------------------------------------------------------------------------------------------------------------------------|-----------------------------------------------------------------------------------------------|
| Formula                                                                              | C <sub>40</sub> H <sub>50</sub> Ag <sub>3</sub> Cl <sub>4</sub> F <sub>18</sub> N <sub>2</sub> P <sub>3</sub> S <sub>8</sub> | C <sub>43</sub> H <sub>48</sub> Ag <sub>4</sub> Cl <sub>2</sub> F <sub>12</sub> N <sub>2</sub> O <sub>12</sub> S <sub>12</sub> | C <sub>25</sub> H <sub>31</sub> Ag <sub>2</sub> F <sub>6</sub> NO <sub>6</sub> S <sub>4</sub> |
| Formula weight                                                                       | 1715.62                                                                                                                      | 1899.93                                                                                                                        | 899.49                                                                                        |
| Temperature                                                                          | 173(2)                                                                                                                       | 173(2)                                                                                                                         | 173(2)                                                                                        |
| Crystal system                                                                       | Orthorhombic                                                                                                                 | Monoclinic                                                                                                                     | Monoclinic                                                                                    |
| Space group                                                                          | <i>Pbcm</i>                                                                                                                  | <i>C2/c</i>                                                                                                                    | <i>P2<sub>1</sub></i>                                                                         |
| <i>Z</i>                                                                             | 4                                                                                                                            | 4                                                                                                                              | 2                                                                                             |
| <i>a</i> (Å)                                                                         | 10.9437(2)                                                                                                                   | 24.3861(9)                                                                                                                     | 11.5778(7)                                                                                    |
| <i>b</i> (Å)                                                                         | 21.7335(3)                                                                                                                   | 10.5716(4)                                                                                                                     | 12.0547(7)                                                                                    |
| <i>c</i> (Å)                                                                         | 25.2207(4)                                                                                                                   | 24.9876(9)                                                                                                                     | 12.4212(8)                                                                                    |
| $\alpha$ (°)                                                                         | 90                                                                                                                           | 90                                                                                                                             | 90                                                                                            |
| $\beta$ (°)                                                                          | 90                                                                                                                           | 106.300(2)                                                                                                                     | 111.230(4)                                                                                    |
| $\gamma$ (°)                                                                         | 90                                                                                                                           | 90                                                                                                                             | 90                                                                                            |
| <i>V</i> (Å <sup>3</sup> )                                                           | 5998.62(17)                                                                                                                  | 6182.9(4)                                                                                                                      | 1615.94(17)                                                                                   |
| <i>D</i> <sub>calc</sub> (g/cm <sup>3</sup> )                                        | 1.900                                                                                                                        | 2.041                                                                                                                          | 1.849                                                                                         |
| 2 $\theta$ <sub>max</sub> (°)                                                        | 52.00                                                                                                                        | 52.00                                                                                                                          | 52.00                                                                                         |
| <i>R</i> <sub>1</sub> , <i>wR</i> <sub>2</sub> [ <i>I</i> > 2 $\sigma$ ( <i>I</i> )] | 0.0608, 0.1562                                                                                                               | 0.0365, 0.0921                                                                                                                 | 0.0321, 0.0660                                                                                |
| <i>R</i> <sub>1</sub> , <i>wR</i> <sub>2</sub> [all data]                            | 0.0732, 0.1647                                                                                                               | 0.0438, 0.0970                                                                                                                 | 0.0349, 0.0676                                                                                |
| Goodness-of-fit on <i>F</i> <sup>2</sup>                                             | 1.045                                                                                                                        | 1.030                                                                                                                          | 1.030                                                                                         |
| No. of reflection used [ $>2\sigma(I)$ ]                                             | 6041 [ <i>R</i> <sub>int</sub> = 0.0543]                                                                                     | 6081 [ <i>R</i> <sub>int</sub> = 0.0451]                                                                                       | 5811 [ <i>R</i> <sub>int</sub> = 0.0314]                                                      |
| Refinement                                                                           | full-matrix                                                                                                                  | full-matrix                                                                                                                    | full-matrix                                                                                   |



**Table S2** Selected bond lengths (Å) and bond angles (°) for **1**

|            |          |            |          |
|------------|----------|------------|----------|
| Ag1-N1     | 2.332(6) | Ag2-S2     | 2.726(2) |
| Ag1-S1     | 2.715(2) | Ag2-S3     | 2.498(2) |
| Ag1-S2     | 2.699(2) | Ag2-S2B    | 2.726(2) |
| Ag1-S4A    | 2.461(2) | Ag2-S3B    | 2.498(2) |
| N1-Ag1-S1  | 76.6(1)  | S2-Ag2-S3  | 86.0(1)  |
| N1-Ag1-S2  | 75.9(1)  | S2-Ag2-S2B | 116.5(1) |
| N1-Ag1-S4A | 148.7(1) | S2-Ag2-S3B | 104.5(1) |
| S1-Ag1-S2  | 132.8(1) | S3-Ag2-S2B | 104.5(1) |
| S1-Ag1-S4A | 107.3(1) | S3-Ag2-S3B | 160.3(1) |
| S2-Ag1-S4A | 116.1(1) |            |          |

Symmetry operations: (A)  $-x+1, -y, -z+1$  (B)  $x, -y+0.5, -z+1$ **Table S3** Selected bond lengths (Å) and bond angles (°) for **2**

|           |          |             |          |
|-----------|----------|-------------|----------|
| Ag1-N1    | 2.398(3) | Ag2-S1A     | 2.525(1) |
| Ag1-S1    | 2.584(1) | Ag2-S3      | 2.546(3) |
| Ag1-S2    | 2.846(1) | Ag2-S4B     | 2.507(1) |
| Ag1-S3    | 2.504(1) | Ag2-O1      | 2.596(1) |
| N1-Ag1-S1 | 75.8(1)  | S1A-Ag2-S3  | 116.3(1) |
| N1-Ag1-S2 | 72.3(1)  | S1A-Ag2-S4B | 136.0(1) |
| N1-Ag1-S3 | 142.2(1) | S1A-Ag2-O1  | 90.3(1)  |
| S1-Ag1-S2 | 137.4(1) | S3-Ag2-S4B  | 104.0(1) |
| S1-Ag1-S3 | 140.0(1) | S3-Ag2-O1   | 112.1(1) |
| S2-Ag1-S3 | 79.7(1)  | S4B-Ag2-O1  | 90.4(1)  |

Symmetry operations: (A)  $x, y+1, z$  (B)  $-x+0.5, y+0.5, -z+0.5$ **Table S4** Selected bond lengths (Å) and bond angles (°) for **3**

|            |          |             |          |
|------------|----------|-------------|----------|
| Ag1-N1     | 2.484(3) | Ag2-S2      | 2.658(1) |
| Ag1-S2     | 2.516(1) | Ag2-S3B     | 2.483(1) |
| Ag1-S4     | 2.467(1) | Ag2-O3      | 2.332(3) |
| Ag2-S1A    | 2.584(1) |             |          |
| N1-Ag1-S2  | 74.9(1)  | S1A-Ag2-S2  | 107.3(1) |
| N1-Ag1-S4  | 137.2(1) | S1A-Ag2-S3B | 119.2(1) |
| S2-Ag1-S4  | 147.8(1) | S1A-Ag2-O3  | 92.8(1)  |
| S2-Ag2-S3B | 105.6(1) | S3B-Ag2-O3  | 140.2(1) |
| S2-Ag2-O3  | 84.2(1)  |             |          |

Symmetry operations: (A)  $-x-1, y+0.5, -z-2$  (B)  $-x-1, y-0.5, -z-2$
